# Supplementary material for: ToSkORL: Selbst- und Fremdeinschätzung bei der Untersuchung des Kopf-Hals-Bereichs
Source: Springer Nature journal article supplement (doi:10.1007/s00106-021-01097-y), 2021-10-07
Supplement: MOESM1 [file 19737272]

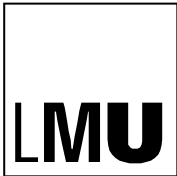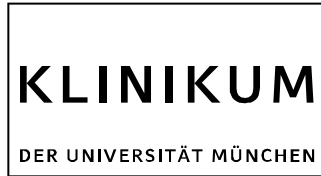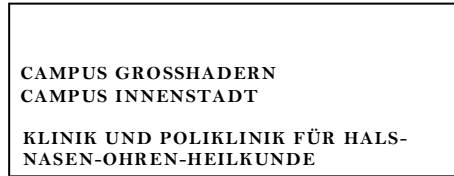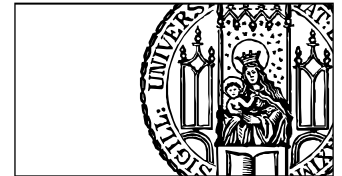

### Mini-CEX Modul 4 (HNO)

#### 1. Allgemeines

- Bitte geben Sie Ihr Alter in Jahren an:
- Bitte geben Sie Ihr Geschlecht an:  weiblich  männlich  divers  k.A.
- Bitte wählen Sie aus der Liste Ihr aktuelles Fachsemester:  
 6  7  8  9  10  11  12  Ich weiß es nicht
- Haben Sie eine Famulatur/ein Praktikum in der Hals-Nasen-Ohrenheilkunde absolviert?  
 ja  nein
- Mein Interesse an der Veranstaltung und dem Fachgebiet Hals-Nasen-Ohrenheilkunde ist:  
 sehr hoch      sehr niedrig  k.A.
- Wie viele Bedside-Kurse in der HNO haben Sie während des Blockpraktikums besucht?  
 1  2  3  4

#### 2. Bitte geben Sie eine Einschätzung zum Grad Ihrer Kompetenzen und allgemeinen klinisch-praktischen Fähigkeiten zum jetzigen Stand Ihrer Ausbildung.

|                                                                                                                                                                            |                |                                                                                                                              |                     |                               |
|----------------------------------------------------------------------------------------------------------------------------------------------------------------------------|----------------|------------------------------------------------------------------------------------------------------------------------------|---------------------|-------------------------------|
| Ich kann eine strukturierte allgemeine körperliche Untersuchung durchführen.                                                                                               | Trifft voll zu | <input type="checkbox"/> <input type="checkbox"/> <input type="checkbox"/> <input type="checkbox"/> <input type="checkbox"/> | Trifft gar nicht zu | <input type="checkbox"/> k.A. |
| Ich halte Kompetenzen in der Diagnostik und Therapie von Erkrankungen des Fachgebiets der Hals-Nasen-Ohrenheilkunde als relevant für meine zukünftige ärztliche Tätigkeit. | Trifft voll zu | <input type="checkbox"/> <input type="checkbox"/> <input type="checkbox"/> <input type="checkbox"/> <input type="checkbox"/> | Trifft gar nicht zu | <input type="checkbox"/> k.A. |
| Ich kann die Lymphknotenstationen des Halses strukturiert untersuchen (Inspektion, Palpation).                                                                             | Trifft voll zu | <input type="checkbox"/> <input type="checkbox"/> <input type="checkbox"/> <input type="checkbox"/> <input type="checkbox"/> | Trifft gar nicht zu | <input type="checkbox"/> k.A. |
| Ich kann den äußeren Kopf und das Gesicht untersuchen (Inspektion, Palpation, Perkussion).                                                                                 | Trifft voll zu | <input type="checkbox"/> <input type="checkbox"/> <input type="checkbox"/> <input type="checkbox"/> <input type="checkbox"/> | Trifft gar nicht zu | <input type="checkbox"/> k.A. |
| Ich kann eine strukturierte klinische Untersuchung des Mund- und Rachen-Bereichs vornehmen                                                                                 | Trifft voll zu | <input type="checkbox"/> <input type="checkbox"/> <input type="checkbox"/> <input type="checkbox"/> <input type="checkbox"/> | Trifft gar nicht zu | <input type="checkbox"/> k.A. |
| Ich kann eine indirekte Laryngoskopie mittels Endoskop durchführen.                                                                                                        | Trifft voll zu | <input type="checkbox"/> <input type="checkbox"/> <input type="checkbox"/> <input type="checkbox"/> <input type="checkbox"/> | Trifft gar nicht zu | <input type="checkbox"/> k.A. |
| Ich kann einen strukturierten Ohrbefund unter Zuhilfenahme eines Hand-Otoskops erheben.                                                                                    | Trifft voll zu | <input type="checkbox"/> <input type="checkbox"/> <input type="checkbox"/> <input type="checkbox"/> <input type="checkbox"/> | Trifft gar nicht zu | <input type="checkbox"/> k.A. |
| Ich kann einen strukturierten Ohrbefund unter Zuhilfenahme eines Ohrmikroskops erheben.                                                                                    | Trifft voll zu | <input type="checkbox"/> <input type="checkbox"/> <input type="checkbox"/> <input type="checkbox"/> <input type="checkbox"/> | Trifft gar nicht zu | <input type="checkbox"/> k.A. |
| Ich kann eine anteriore Rhinoskopie zur Untersuchung der Nasenhaupthöhle mittels Nasenspekulum durchführen.                                                                | Trifft voll zu | <input type="checkbox"/> <input type="checkbox"/> <input type="checkbox"/> <input type="checkbox"/> <input type="checkbox"/> | Trifft gar nicht zu | <input type="checkbox"/> k.A. |
| Ich kann eine Endoskopie der Nasenhaupthöhle, des Nebenhöhlensystems und des Nasenrachens durchführen.                                                                     | Trifft voll zu | <input type="checkbox"/> <input type="checkbox"/> <input type="checkbox"/> <input type="checkbox"/> <input type="checkbox"/> | Trifft gar nicht zu | <input type="checkbox"/> k.A. |
| Ich kann eine Stimmgabelprüfung nach Weber und Rinne durchführen und interpretieren.                                                                                       | Trifft voll zu | <input type="checkbox"/> <input type="checkbox"/> <input type="checkbox"/> <input type="checkbox"/> <input type="checkbox"/> | Trifft gar nicht zu | <input type="checkbox"/> k.A. |
