# Supplementary material for: ToSkORL: Selbst- und Fremdeinschätzung bei der Untersuchung des Kopf-Hals-Bereichs
Source: Springer Nature journal article supplement (doi:10.1007/s00106-021-01097-y), 2021-10-07
Supplement: MOESM2 [file 19737272]

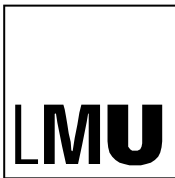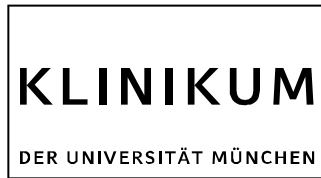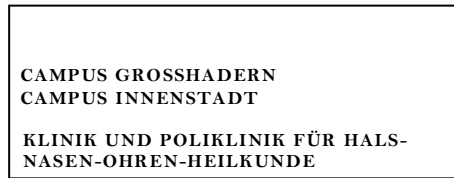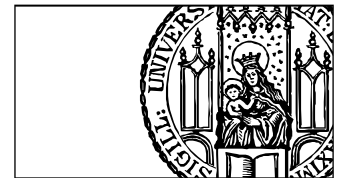

### Mini-CEX Modul 4 (HNO)

#### 1. Allgemeines

- Studierendenpärchen (Untersucher und Proband) für Mini-CEX bilden, keine weiteren Beobachter im Raum
  - Aufteilen der Untersuchung (Gesamtuntersuchung durch 2 Studierende abgedeckt)
  - Standardisierte Aufgaben vorlesen und Theorie/Durchführung bewerten
  - Eingreifen/Hilfestellung, wenn Untersucher nicht in der Lage ist, die Untersuchung durchzuführen bzw. bevor er den Proband gefährdet
2. Evaluation klinisch-praktischer Fertigkeiten

#### Untersuchung des äußeren Halses (klinische Lymphknotenuntersuchung)

**Theorie:** Der Studierende kann die Halslevels (I-VI) und wichtige Kriterien zur Beschreibung von Raumforderungen benennen sowie das Vorgehen bei der Halsuntersuchung erläutern (strukturiertes Abtasten). Trifft  Trifft gar voll zu nicht zu

**Praxis:** Der Studierende kann die Untersuchung der Halslymphknoten strukturiert durchführen und ggf. getastete Lymphknoten präzise beschreiben. Trifft  Trifft gar voll zu nicht zu

War bei der Untersuchung **Hilfestellung**  Nein  Ja, mündl.  Ja, prakt. Hilfestellung notwendig/musste **eingegriffen** werden? **Hinweise** **oder Eingreifen**

**Gesamtbeurteilung:** Der Studierende kann die Untersuchung im Gesamten so durchführen, dass ein **valider Befund erhoben** werden kann. Trifft  Trifft gar voll zu nicht zu

#### Äußerer Kopf/Gesicht (Inspektion, Palpation, Perkussion)

**Theorie:** Der Studierende kann die Einzelschritte der Untersuchung des Gesichts-/Kopfbereichs erläutern (Inspektion, Palpation, Perkussion bei Trauma/V.a. Sinusitis). Trifft  Trifft gar voll zu nicht zu

**Praxis:** Der Studierende kann den äußeren Kopf-/Gesichtsbereich strukturiert untersuchen (Inspektion, Palpation (Nase, Orbitarahmen, Jochbogen, Maxilla, Zähne), Perkussion (NNH)). Trifft  Trifft gar voll zu nicht zu

War bei der Untersuchung **Hilfestellung**  Nein  Ja, mündl.  Ja, prakt. Hilfestellung notwendig/musste **eingegriffen** werden? **Hinweise** **oder Eingreifen**

**Gesamtbeurteilung:** Der Studierende kann die Untersuchung im Gesamten so durchführen, dass ein **valider Befund erhoben** werden kann. Trifft  Trifft gar voll zu nicht zu

#### Mund-/Racheninspektion

**Theorie:** Der Studierende kann die Einzelschritte der Mund-/Racheninspektion erläutern (Stirnlicht, Mundspatel, Untersuchung Vestibulum oris, Zunge, Mundboden, Tonsillen, Speicheldrüsen). Trifft  Trifft gar voll zu nicht zu

**Praxis:** Der Studierende kann die Einzelschritte der die Einzelschritte der Mund-/Racheninspektion durchführen (korrekte Handhabung Stirnlicht/Mundspatel, Untersuchung Vestibulum oris, Zunge, Mundboden, Tonsillen, Speicheldrüsen). Trifft  Trifft gar voll zu nicht zu

War bei der Untersuchung **Hilfestellung**  **Nein**  **Ja, mündl.**  **Ja, prakt. Hilfestellung**  
 notwendig/musste **eingegriffen** werden? **Hinweise** **oder Eingreifen**

**Gesamtbeurteilung:** Der Studierende kann die Untersuchung im Gesamten so durchführen, dass ein **valider Befund erhoben** werden kann. **Trifft voll zu**      **Trifft gar nicht zu**

### Indirekte Laryngoskopie

**Theorie:** Der Studierende kann die Einzelschritte der indirekten Laryngoskopie erläutern (insb. Positionieren des Patienten, Fassen der Zunge, Atmung durch den Mund) und die wichtigsten erkennbaren anatomischen Strukturen benennen. **Trifft voll zu**      **Trifft gar nicht zu**

**Praxis:** Der Studierende kann die Einzelschritte der indirekten Laryngoskopie durchführen (insb. Positionieren des Patienten, Fassen der Zunge, Atmung durch den Mund, vorsichtiges Einführen des Endoskops). **Trifft voll zu**      **Trifft gar nicht zu**

War bei der Untersuchung **Hilfestellung**  **Nein**  **Ja, mündl.**  **Ja, prakt. Hilfestellung**  
 notwendig/musste **eingegriffen** werden? **Hinweise** **oder Eingreifen**

**Gesamtbeurteilung:** Der Studierende kann die Untersuchung im Gesamten so durchführen, dass ein **valider Befund erhoben** werden kann. **Trifft voll zu**      **Trifft gar nicht zu**

### Ohrmikroskopie/Otoskopie

**Theorie:** Der Studierende kann die Einzelschritte der Ohrmikroskopie erläutern (insb. Positionieren des Patienten, Zug an der Ohrmuschel, Auswahl/ Einführen des Ohrtrichters, Einstellen des Fokus). **Trifft voll zu**      **Trifft gar nicht zu**

**Praxis:** Der Studierende kann die Einzelschritte der Ohrmikroskopie durchführen (insb. Positionieren des Patienten, Zug an der Ohrmuschel, Auswahl/ Einführen des Ohrtrichters, Einstellen des Fokus). **Trifft voll zu**      **Trifft gar nicht zu**

War bei der Untersuchung **Hilfestellung**  **Nein**  **Ja, mündl.**  **Ja, prakt. Hilfestellung**  
 notwendig/musste **eingegriffen** werden? **Hinweise** **oder Eingreifen**

**Gesamtbeurteilung:** Der Studierende kann die Untersuchung im Gesamten so durchführen, dass ein **valider Befund erhoben** werden kann. **Trifft voll zu**      **Trifft gar nicht zu**

**Praxis (Otoskopie):** Der Studierende kann die Einzelschritte der Ohrmikroskopie durchführen (korrekte Kopfposition des Patienten, Zug an der Ohrmuschel, Einführen des Otoskops) **Trifft voll zu**      **Trifft gar nicht zu**

**Gesamtbeurteilung (Otoskopie):** Der Studierende kann die Untersuchung im Gesamten so durchführen, dass ein **valider Befund erhoben** werden kann. **Trifft voll zu**      **Trifft gar nicht zu**

### Stimmgabelprüfung Weber/Rinne

**Theorie:** Der Studierende kann die Stimmgabelprüfung nach Weber und Rinne erläutern und eine einseitige Schalleitungs- und Schallempfindungsstörung differenzieren. **Trifft voll zu**      **Trifft gar nicht zu**

**Praxis:** Der Studierende kann die Stimmgabelprüfung nach Weber und Rinne korrekt durchführen (ausreichendes **Trifft voll zu**      **Trifft gar nicht zu**

Anschlagen der Stimmgabel, Positionieren der Stimmgabel, korrekte Patienteninstruktion).

War bei der Untersuchung **Hilfestellung**  **Nein**  **Ja, mündl. Hinweise**  **Ja, prakt. Hilfestellung oder Eingreifen** notwendig/musste **eingegriffen** werden?

**Gesamtbeurteilung:** Der Studierende kann die Untersuchung im Gesamten so durchführen, dass ein **valider Befund erhoben** werden kann. **Trifft voll zu**      **Trifft gar nicht zu**

### Anteriore Rhinoskopie

**Theorie:** Der Studierende kann die Einzelschritte der anterioren Rhinoskopie erläutern (insb. Halten des Spekulum, Handhabung des Stirnlichts, korrektes Ein-/Ausführen des Spekulum) und erkennbare Strukturen benennen. **Trifft voll zu**      **Trifft gar nicht zu**

**Praxis:** Der Studierende kann die Einzelschritte der anterioren Rhinoskopie durchführen (Stirnlicht einstellen, korrektes Halten des Spekulum, offenes Ein-/Ausführen, Vermeidung von Septumberührung). **Trifft voll zu**      **Trifft gar nicht zu**

War bei der Untersuchung **Hilfestellung**  **Nein**  **Ja, mündl. Hinweise**  **Ja, prakt. Hilfestellung oder Eingreifen** notwendig/musste **eingegriffen** werden?

**Gesamtbeurteilung:** Der Studierende kann die Untersuchung im Gesamten so durchführen, dass ein **valider Befund erhoben** werden kann. **Trifft voll zu**      **Trifft gar nicht zu**

### Nasenendoskopie

**Theorie:** Der Studierende kann die Einzelschritte der Nasenendoskopie erläutern (insb. Vorbereitung mit Abschwellen/Betäuben, vorsichtiges Einführen) und erkennbare Strukturen benennen. **Trifft voll zu**      **Trifft gar nicht zu**

**Praxis:** Der Studierende kann die Einzelschritte der Nasenendoskopie durchführen (vorsichtiges Verschieben des Endoskops, Inspektion des mittleren Nasengangs und des Nasopharynx). **Trifft voll zu**      **Trifft gar nicht zu**

War bei der Untersuchung **Hilfestellung**  **Nein**  **Ja, mündl. Hinweise**  **Ja, prakt. Hilfestellung oder Eingreifen** notwendig/musste **eingegriffen** werden?

**Gesamtbeurteilung:** Der Studierende kann die Untersuchung im Gesamten so durchführen, dass ein **valider Befund erhoben** werden kann. **Trifft voll zu**      **Trifft gar nicht zu**
